# Supplementary material
Source: publisher site journal article supplement (https://www.dovepress.com/article/496728)
Supplement: Supplementary file 1 [file get_supplementary_file.php]

**Table 1**. Comparisons of Baseline Data of Non-Dropout Versus Dropout at 3- and 6-Month Follow-Up

| **Variable** | | **3 months** | | | | | **6 months** | | | | |
| --- | --- | --- | --- | --- | --- | --- | --- | --- | --- | --- | --- |
| **Dropout (n=35)** | | **non-dropout (N=133)** | | ***p value*** | **Dropout (n=47)** | | **non-dropout (n=121)** | | ***p value*** |
| **Mean** | **SD** | **Mean** | **SD** | **Mean** | **SD** | **Mean** | **SD** |
| **Age (year)** | | 40.39 | 16.04 | 44.38 | 16.99 | 0.37 | 41.08 | 15.48 | 44.55 | 17.31 | 3.98 |
| **BCVA (LOGMAR)** | | **0.07** | 0.20 | 0.07 | 0.15 | *0.92* | 0.06 | 0.17 | 0.07 | 0.15 | *0.63* |
| **IOP (mmHg)** | | 14.26 | 4.19 | 15.75 | 4.82 | *0.11* | 15.12 | 4.58 | 15.57 | 4.79 | *0.59* |
| **Refraction ( D)** | **Sphere** | -1.40 | 2.08 | -1.21 | 2.53 | *0.68* | -1.29 | 2.04 | -1.23 | 2.59 | *0.90* |
| **Cylinder** | -0.62 | 1.01 | -0.65 | 0.99 | *0.86* | -0.53 | 0.90 | -0.69 | 1.02 | *0.33* |
| **SE** | -1.71 | 2.09 | -1.54 | 2.66 | *0.72* | -1.55 | 2.08 | -1.58 | 2.71 | *0.95* |
| **CCT(µm)** | | 521.03 | 45.37 | 522.95 | 36.22 | *0.79* | 527.36 | 42.34 | 520.68 | 36.43 | *0.31* |
| **OCT RNFL(µm)** | **Sup** | 110.26 | 29.47 | 106.58 | 27.88 | *0.50* | 111.76 | 27.79 | 105.63 | 28.23 | *0.21* |
| **Inf** | 113.21 | 34.97 | 109.81 | 32.86 | *0.60* | 114.67 | 33.48 | 108.90 | 33.13 | *0.32* |
| **Average** | 96.38 | 28.81 | 89.70 | 22.48 | *0.15* | 96.50 | 27.16 | 88.99 | 22.40 | *0.07* |
| **SAP** | **Duration(min)** | 5.41 | 1.13 | 5.53 | 0.95 | *0.52* | 5.42 | 1.12 | 5.54 | 0.93 | *0.47* |
| **MD (dB)** | -6.45 | 9.04 | -6.66 | 8.85 | *0.90* | -6.08 | 8.80 | -6.82 | 8.92 | *0.62* |
| **VFI (%)** | 85.57 | 27.39 | 84.26 | 26.85 | *0.80* | 86.74 | 26.30 | 83.68 | 27.17 | *0.51* |
| **PSD (dB)** | 3.56 | 2.94 | 3.71 | 3.61 | *0.82* | 3.31 | 2.78 | 3.82 | 3.71 | *0.39* |
| **OCCP** | **Duration(min)** | 5.83 | 1.74 | 5.81 | 1.89 | *0.95* | 6.03 | 2.07 | 5.73 | 1.76 | *0.35* |
| **MD (dB)** | -4.97 | 6.45 | -5.65 | 7.37 | *0.62* | -5.21 | 6.62 | -5.62 | 7.40 | *0.74* |
| **VFI (%)** | 87.20 | 19.31 | 85.81 | 23.44 | *0.75* | 87.15 | 20.14 | 85.69 | 23.55 | *0.71* |
| **PSD (dB)** | 4.01 | 2.79 | 5.11 | 15.50 | *0.68* | 3.91 | 2.59 | 5.25 | 16.24 | *0.58* |
| SD = standard deviation; D = Diopter; dB = decibel; BCVA = Best corrected Visual Acuity; OCCP = online circular contrast perimetry; MD = mean deviation; PSD = pattern standard deviation; VFI = visual field index; SAP = standard automated perimetry; OCT = Optical coherence tomography; RNFL = retinal nerve fiber layer. Inf = inferior, Sup = superior layer, CCT= central corneal thickness; SE= spherical equivalent; IOP= intra-ocular pressure; n = number of eyes. | | | | | | | | | | | |

**Table 2. Characteristics of circular contrast perimetry at baseline, stratified by left and right eye**

|  |  |  |  |  |
| --- | --- | --- | --- | --- |
|  | **Right eye (OD)** | **Left eye (OS)** | **Total** | **p-value** |
| **N** | **82** | **86** | **168** |  |
| **Best corrected visual acuity (Mean, SD)** | 0.1 (0.2) | 0.1 (0.1) | 0.1 (0.2) | 0.717 |
| **Intraocular pressure (Mean, SD)** | 15.3 (3.9) | 15.5 (5.4) | 15.4 (4.7) | 0.743 |
| **Spherical Equivalence (Mean, SD)** | -1.6 (2.6) | -1.6 (2.5) | -1.6 (2.5) | 0.997 |
| **Central corneal thickness (Mean, SD)** | 521.4 (38.2) | 523.5 (37.7) | 522.5 (37.8) | 0.723 |
| **Retinal Nerve Fiber Layer Average (Mean, SD)** | 90.9 (22.4) | 91.5 (25.0) | 91.2 (23.7) | 0.875 |
| **Retinal Nerve Fiber Layer Superior (Mean, SD)** | 105.6 (26.7) | 108.5 (29.6) | 107.1 (28.1) | 0.501 |
| **Retinal Nerve Fiber Layer Inferior (Mean, SD)** | 111.5 (33.1) | 108.6 (33.6) | 110.0 (33.3) | 0.577 |
| **Classification of Glaucoma (n, %)** |  |  |  | 0.627 |
| 0.Normal | 34 (41.5) | 30 (34.5) | 64 (37.9) |  |
| 1.Mild | 27 (32.9) | 37 (42.5) | 64 (37.9) |  |
| 2.Moderate | 7 (8.5) | 6 (6.9) | 13 (7.7) |  |
| 3.Severe | 14 (17.1) | 14 (16.1) | 28 (16.6) |  |
| **Glaucoma (n, %)** |  |  |  | 0.781 |
| No | 29 (35.4) | 29 (33.3) | 58 (34.3) |  |
| Yes | 53 (64.6) | 58 (66.7) | 111 (65.7) |  |

Note: T-test used for continuous variables and Chi-squared test used for categorical variables
